# Supplementary material
Source: MDPI journal article supplement (https://www.mdpi.com/2076-3417/13/5/3236)
Supplement: s1 [file s1 › Table S2 Operationalizations of learning analytics capabilities.xlsx]

## Sheet: Analyse
Category	Capability	Question	Aanwezig of beschreven?	Opmerking.
Data	Data usage	Does the roadmap describe what kind of analysis is performed?
Data	Data usage	Does the roadmap describe the goal(s) of the analysis?
Data	Data usage	Does the roadmap describe what interventions are performed based on the outcomes?
Data	Quality	Does the roadmap describe in what way the quality of data is secured?
Data	Reporting	Does the roadmap describe in what way the outcomes of data analysis are presented?
Data	Sourcing & integration	Does the roadmap describe what data sources are used?
Data	Sourcing & integration	Does the roadmap describe in what way different sources are integrated?
Data	Feedback on analytics	Does the roadmap describe how feedback from users is collected?
Management	Identifying benefits	Does the roadmap describe in what way learning is improved?
Management	Capability development	Does the roadmap describe in what way existing organizational capabilities are managed, reconfigured and developed?
Management	Culture & readiness	Does the roadmap describe how to develop readiness factors necessary for the adoption of learning analytics?
Management	Culture & readiness	Does the roapmap describe how to grow a data-informed culture?
Management	Funding & investment	Does the roadmap describe in what way proper funding and investment is secured?
Management	External environment	Does the roadmap describe in what way material and tools from external parties are used?
Management	External environment	Does the roadmap describe what materials, knowledge and experiences are shared with other (higher) educational institutions?
Management	Performance monitoring	Does the roadmap describe in what way the performance of analytical processes and applications are measured?
Management	Responsibility & accountability	Does the roadmap describe who is responsible and accountable for what task?
Management	Responsibility & accountability	Does the roadmap describe how the leadership structure should be?
Management	Strategy	Does the roadmap describe how learning analytics are aligned with the (long-term) organizational vision, strategy, and policy?
Management	Policies & CoP	Does the roadmap describe the formulation of learning analytics policies and codes-of-practice?
Management	Implementation Deployment & Application	Does the roadmap describe what activities to deploy before the implementation of learning analytics (systems)?
Management	Evidence-based & theory-driven	Does the roadmap describe how to include evidence and theory in the design of learning analytics?
People	Collaboration	Does the roadmap describe how collaboration between parties - either within a group of stakeholders or between different groups of stakeholders, is achieved?
People	Combined skills and knowledge	Does the roadmap describe the combined skills and knowledge stakeholders need to have in order to perform learning analytics activities and act on it accordingly?
People	Communication	Does the roadmap describe how flows of information between stakeholders (groups) are achieved?
People	Stakeholder Identification & Engagement	Does the roadmap describe the different (types of) stakeholders who should be involved?
People	Stakeholder Identification & Engagement	Does the roadmap describe for what purposes stakeholders should be involved in the design, implementation, and use of learning analytics?
People	Training	Does the roadmap describe what training stakeholders should get in order to perform learning analytics activities and act on the outcomes?
Technology	Automation	Does the roadmap describe how to automate learning analytics activities?
Technology	Connectivity	Does the roadmap describe in what way systems can be connected?
Technology	Infrastructure	Does the roadmap describe the required IT infrastructure?
Technology	System characteristics	Does the roadmap describe both the quantitative and qualitative requirements for the systems used to perform learning analytics activities?
Privacy & Ethics	Ethics	Does the roadmap describe in what way ethical issues should be considered and solved?
Privacy & Ethics	Human decision-making	Does the roadmap describe the role of humans in decision-making based on data?
Privacy & Ethics	Security	Does the roadmap describe how data and information is secured?
Privacy & Ethics	Transparency	Does the roadmap describe how to be transparent about the used definitions, decisions made during the process and context in which learning analytics was used?
Privacy & Ethics	Legal compliance	Does the roadmap describe how to comply with the law?

## Sheet: Draaitabel
Rijlabels
Data
Data usage
Feedback on analytics
Quality
Reporting
Sourcing & Integration
Access to data
Central storage of data
Data source
Error-free integration
Integration of external sources
Integration of internal sources
Linking data
Management
Capability Development
Data
Management
People
Privacy & Ethics
Technology
Culture & readiness
Accepted by users
Changed behavior
Considered as useful
Data-driven mindset
Institutional practices
Manage expectations
Organizational culture
Overcoming resistance
Senior leadership support
Trust
Evidence-based & theory-driven
External environment
Funding & investment
Identifying Benefits
Implementation, Deployment & Application
Performance monitoring
Policies & CoP
Responsibility & accountability
Strategy
People
Collaboration
Combined Skills & Knowledge
Communication
Communicate with users to understand context
Listen to users and what their needs are
Mechanisms for communication
Sharing information and know-how
Change how information is communicated and shared
Establish communication channels between different stakeholders across the institution.
Identify communications bottlenecks within our organization when sharing analytics insights.
Let information be widely shared between the learning analytics team and line people so that those who make decisions or perform jobs have access to all available know-how.
Let the learning analytics team and line people from various departments, frequently attend cross-functional meetings.
Let the learning analytics team and line people meet frequently to discuss important issues both formally and informally.
Test your findings statistically before they are shared with stakeholders
User-initiated analysis
Stakeholder Identification & Engagement
Training
Privacy & Ethics
Ethics
Human decision-making
Legal compliance
Security
Transparency
Transparency
Explain what an algorithm does
(leeg)
Technology
Automation
Connectivity
Infrastructure
System characteristics
Accessibility
Ease of use
Flexible and adaptable
Information protection
Reliability
Technological characteristics
Timeliness
User demands
Eindtotaal

## Sheet: Vragen per capability
Data usage	Does the roadmap describe what kind of analysis is performed?
Data usage	Does the roadmap describe the goal(s) of the analysis?
Data usage	Does the roadmap describe what interventions are performed based on the outcomes?
Quality	Does the roadmap describe in what way the quality of data is secured?
Reporting	Does the roadmap describe in what way the outcomes of data analysis are presented?
Sourcing & integration	Does the roadmap describe what data sources are used?
Sourcing & integration	Does the roadmap describe in what way different sources are integrated?
Feedback on analytics	Does the roadmap describe how feedback from users is collected?
Identifying benefits	Does the roadmap describe in what way learning is improved?
Capability development	Does the roadmap describe in what way existing organizational capabilities are managed, reconfigured and developed?
Culture & readiness	Does the roadmap describe how to develop readiness factors necessary for the adoption of learning analytics?
Culture & readiness	Does the roapmap describe how to grow a data-informed culture?
Funding & investment	Does the roadmap describe in what way proper funding and investment is secured?
External environment	Does the roadmap describe in what way material and tools from external parties are used?
External environment	Does the roadmap describe what materials, knowledge and experiences are shared with other (higher) educational institutions?
Performance monitoring	Does the roadmap describe in what way the performance of analytical processes and applications are measured?
Responsibility & accountability	Does the roadmap describe who is responsible and accountable for what task?
Responsibility & accountability	Does the roadmap describe how the leadership structure should be?
Strategy	Does the roadmap describe how learning analytics are aligned with the (long-term) organizational vision, strategy, and policy?
Policies & CoP	Does the roadmap describe the formulation of learning analytics policies and codes-of-practice?
Implementation Deployment & Application	Does the roadmap describe what activities to deploy before the implementation of learning analytics (systems)?
Evidence-based & theory-driven	Does the roadmap describe how to include evidence and theory in the design of learning analytics?
Collaboration	Does the roadmap describe how collaboration between parties - either within a group of stakeholders or between different groups of stakeholders, is achieved?
Combined skills and knowledge	Does the roadmap describe the combined skills and knowledge stakeholders need to have in order to perform learning analytics activities and act on it accordingly?
Communication	Does the roadmap describe how flows of information between stakeholders (groups) are achieved?
Stakeholder Identification & Engagement	Does the roadmap describe the different (types of) stakeholders who should be involved?
Stakeholder Identification & Engagement	Does the roadmap describe for what purposes stakeholders should be involved in the design, implementation, and use of learning analytics?
Training	Does the roadmap describe what training stakeholders should get in order to perform learning analytics activities and act on the outcomes?
Automation	Does the roadmap describe how to automate learning analytics activities?
Connectivity	Does the roadmap describe in what way systems can be connected?
Infrastructure	Does the roadmap describe the required IT infrastructure?
System characteristics	Does the roadmap describe both the quantitative and qualitative requirements for the systems used to perform learning analytics activities?
Ethics	Does the roadmap describe in what way ethical issues should be considered and solved?
Human decision-making	Does the roadmap describe the role of humans in decision-making based on data?
Security	Does the roadmap describe how data and information is secured?
Transparency	Does the roadmap describe how to be transparent about the used definitions, decisions made during the process and context in which learning analytics was used?
Legal compliance	Does the roadmap describe how to comply with the law?

## Sheet: LACM
Category (2nd order)	Capability (1st order)	Operationalization (0th order)
Data	Data usage	Aggregate data to a higher level
Data	Data usage	Aggregate student id, degree program, and year. Each combination is one row in the data set
Data	Data usage	Aggregate data in the right way
Data	Data usage	Analyze data in near-real or real time that allows responses to unexpected educational events
Data	Data usage	Analyze information in near-real or real time
Data	Data usage	Analyze large amounts of educational data to understand the past and current state for specific target variables
Data	Data usage	Analyze semi-structured and unstructured data (e.g., imaging data, the meaning and context of human language and voice) to improve education
Data	Data usage	Analyze social media data to understand current trends from a large population
Data	Data usage	Analyze whether demands for course credits are suitable or not
Data	Data usage	Analyze effects of class scheduling and performance
Data	Data usage	Analyze student success
Data	Data usage	Answering questions related to degree programs, like when most students enroll or relations between learning behavior and enrollment
Data	Data usage	Do course analyses and see how students flow through their education
Data	Data usage	Examine undetected correlations, patterns, trends between specific variables of interest across regions or facilities
Data	Data usage	Explore the causes of occurred educational events from relational databases
Data	Data usage	Identify correlations and patterns from diverse data to gain new insights
Data	Data usage	Identify from what schools students come from and adjust marketing activities accordingly
Data	Data usage	Search educational databases for all data related to student characteristics and conditions
Data	Data usage	Track learning events based on the rules that built on educational data sets
Data	Data usage	Track student data based on the rules that built on educational data sets
Data	Data usage	Analyze that when students are delayed, how realistic is it to expect they get back on track
Data	Data usage	Cluster students based on common characteristics
Data	Data usage	Compare “what if” scenarios
Data	Data usage	Compare students to each other and plotting study paths
Data	Data usage	Provide comparative interpretation of similar student cases over time
Data	Data usage	Correlate student evaluation and certain elements of the program
Data	Data usage	Detect fraud, abuse, waste, and errors in education
Data	Data usage	Early identify students who might get delayed
Data	Data usage	Early identify study problems
Data	Data usage	Identify best moment of contact with students based on data
Data	Data usage	Identify correlation
Data	Data usage	Identify students who lag behind
Data	Data usage	Identify students with academic potential
Data	Data usage	Identify students who need extra follow up
Data	Data usage	Identify delayed students
Data	Data usage	Build automated algorithms where they can support decision making for improving student success
Data	Data usage	Monitor student progress on a daily basis
Data	Data usage	Support personalized learning strategies
Data	Data usage	Use learning analytics in a supportive manner (support student and teacher daily work) rather than a business manner
Data	Data usage	Allow to predict student behaviors
Data	Data usage	Calculate chances of dropping-out
Data	Data usage	Compare cross-referencing current and historical data and its outcomes to predict future trends
Data	Data usage	Intervene early based on predictions
Data	Data usage	Build models like a generalized additive model (GAM)
Data	Data usage	Generate a set of predictions about the effectiveness of various intervention options for students based on unique characteristics.
Data	Data usage	Make a study plan and predict its realizability
Data	Data usage	Perform “what if” analysis using predictive modeling
Data	Data usage	Predict chances of dropping-out based on 20 variables
Data	Data usage	Predict costs and income
Data	Data usage	Predict patterns of education in response to students needs
Data	Data usage	Perform a regression analysis
Data	Data usage	Be focused on providing learners with data and information to self regulate their own learning
Data	Data usage	Create awareness about other learning practices and social networks around them that they can use to make to meaningful connections
Data	Data usage	Generate support for discussions and confirm gut-feeling
Data	Data usage	Help learners keep track of the effects of their experiments on their learning in which "treatments" are changes they make to tactics used in learning
Data	Data usage	Help learners understand their learning rather than pointing out what they are doing wrong
Data	Data usage	Improve communication towards students, for example about possible barriers in the near future
Data	Data usage	Inform students about study progress
Data	Data usage	Make informed decisions about study paths
Data	Data usage	Provide educators with formative feedback which helps them improve their practice
Data	Data usage	Provide feedback to all stages of the learning process (design, dean, teacher, gov't officials, learner, etc.)
Data	Data usage	Provide insights in study path
Data	Data usage	Use learning analytics to evaluate policies
Data	Data usage	Move from individual prediction to supporting policymaking processes
Data	Data usage	Provide analyses and visualizations to help policymaking
Data	Data usage	Provide near-real or real time information on educational operations and services within educational institutions and across educational systems
Data	Data usage	Run broad multidisciplinary studies that extract important insights from large amounts of student data.
Data	Data usage	Support organizational work groups
Data	Data usage	Enable innovation in services or products based on novel use of (or insights from) data
Data	Data usage	Use external sources (data) always facilitates understanding of market conditions.
Data	Data usage	Use external sources (data) always facilitates understanding of students ‘demands.
Data	Data usage	Use internal sources for educational management always minimizes total educational costs.
Data	Feedback on analytics	Develop new analyses based on feedback
Data	Feedback on analytics	Let learning analytics be judged useful by learners
Data	Feedback on analytics	Let feedback change the way results are presented.
Data	Feedback on analytics	Ask users to inform the learning analytics team when they see strange things
Data	Feedback on analytics	Provide opportunities for students to provide feedback on results of analytics.
Data	Feedback on analytics	Seek feedback from primary users through various channels.
Data	Feedback on analytics	Ask stakeholders for feedback
Data	Quality	Clean data first
Data	Quality	Ensure data are good and sorted
Data	Quality	Decide the scope of the project and thus the range of data.
Data	Quality	Enter data correctly, otherwise this might lead to inaccurate records.
Data	Quality	Ensure the use of data with the right quality and data that are clean
Data	Quality	Select data that will be fed back to different stakeholders.
Data	Quality	Filter double records, for example students who do two courses and therefore are shown twice.
Data	Quality	Check whether records are not registered in the right academic year but according the actual data of an event.
Data	Quality	Ensure there is no input error in all data.
Data	Quality	Ensure the use of the right kind of data
Data	Quality	Input all internal data sources without ommisions.
Data	Quality	Input all external data sources without ommisions.
Data	Quality	Identify missing data
Data	Quality	Check whether all data is read and not only the first couple of rows.
Data	Quality	Ensure data sets are correct as problems due to incomplete data are hard to be found.
Data	Quality	Ensure that data sets are complete as this makes qualitative good data.
Data	Quality	Ensure there is no missing data.
Data	Quality	Ensure that the learning analytics used provides a complete set of information.
Data	Quality	Ensure that the learning analytics used provides all the information needed.
Data	Quality	Have data sets that are complete, so no other scenario's than the one showed are possible
Data	Quality	Ensure that the learning analytics used produces comprehensive information.
Data	Quality	Ensure that the learning analytics used produces correct information.
Data	Quality	Ensure that the learning analytics used provides accurate information.
Data	Quality	Ensure that the learning analytics used provides few errors in the information.
Data	Quality	Have standards for comparison across instances, institutions, etc.
Data	Quality	Use a common definition of the main data source.
Data	Quality	Manage all data in the same way throughout the organization.
Data	Quality	Standardize data to support comparisons across areas.
Data	Quality	Consider data needs, access and availability
Data	Quality	Provide easy access and use of data
Data	Quality	Make students records consistent, visible and easily accessible for further analysis.
Data	Quality	Ensure that the information provided by the learning analytics is clearly presented on the screen.
Data	Quality	Ensure that the information provided by the learning analytics is well formatted.
Data	Quality	Ensure that the information provided by the learning analytics is well laid out.
Data	Quality	Make clear what data are about.
Data	Quality	Standardize labeling, so you know what the data is about
Data	Quality	Add time stamps as most data sets don't have them.
Data	Quality	Prevent the use of open text fields as they lead to ambiguous labeling of data.
Data	Quality	Ensure the meaning of data labels are clear.
Data	Quality	Ensure the labeling of variables is unambiguous.
Data	Quality	Ensure all variables are described in documentation.
Data	Quality	Ensure data can be linked, otherwise the usability is minimal at best
Data	Quality	Construct linking tables to link data from different sources
Data	Quality	Extract data in such way that is easily maintainable
Data	Quality	Have master data management and metadata management to ensure data definitions
Data	Quality	Have mechanisms to ensure quality
Data	Quality	Compare input and output automatically
Data	Quality	Ensure that the learning analytics used always provides up-to-date information.
Data	Quality	Ensure that the learning analytics used produces the most current information.
Data	Quality	Ensure that the learning analytics used provides the most recent information.
Data	Quality	Realize that when data are inputted not on time, the analysis cannot lead to valid outcomes
Data	Reporting	Combine data to get new insights
Data	Reporting	Generate proactive learning recommendations
Data	Reporting	Provide actionable insights or recommendations in a format readily understood by its users
Data	Reporting	Provide actionable insights to decision-makers in near-real or real time
Data	Reporting	Provide system outputs for role-based decision-making
Data	Reporting	Ensure that reports are in the right format and show the right data to inform decisions
Data	Reporting	Provide actionable actions as there is a gap between getting new insights and knowing what to do next
Data	Reporting	Build a good dashboard that provides insights
Data	Reporting	Build a good dashboard as a lot of data is stored in Excel sheets but a dashboard with filters works quicker and looks nicer
Data	Reporting	Build a good dashboard
Data	Reporting	Use, for example, Tableau
Data	Reporting	Build a good dashboard or spreadsheet with filters
Data	Reporting	Build a good dashboard to show the study advise
Data	Reporting	Generate learning summaries (or performance metrics) in real time or near real time and present this in visual dashboards/systems
Data	Reporting	Make a dashboard to see where in a program students earn their course credits
Data	Reporting	Realize that with the more insights, the more variables are necessary, the more complex the dashboard gets
Data	Reporting	Choose analytical models and define metrics.
Data	Reporting	Make clear how confident any predictions about student success/failure are, and why those predictions are being made
Data	Reporting	Justify models with text that is derived from the dashboard
Data	Reporting	Explained outcomes so no wrong conclusions are drawn
Data	Reporting	Report also the programming codes and scripts
Data	Reporting	Describe the justification also in text when reporting a model.
Data	Reporting	Give a demonstration
Data	Reporting	Give internal presentations
Data	Reporting	Present results
Data	Reporting	Think about the way outcomes are presented.
Data	Reporting	Limit the number of variables included in a report in order to come closer to the user.
Data	Reporting	Realize that it is hard to exactly present what the data means and that presentation is always a bit clouded.
Data	Reporting	Produce results that are presented in such a way that the end users can drill down to the raw data so that validity can be checked.
Data	Reporting	Provide systemic and comprehensive reporting to help recognize feasible opportunities for learning improvement.
Data	Reporting	Provide a visualization with key figures
Data	Reporting	Consider the best ways to present analytics results (e.g., visualization).
Data	Reporting	Visualize learning analytics outcomes in pictures
Data	Reporting	Provide visualizations
Data	Reporting	Use visualizations with colors
Data	Reporting	Provided tutors and student advisors with an overview
Data	Sourcing & Integration	Build the ability to acquire, curate, maintain and enhance datasets based on value maximization
Data	Sourcing & Integration	Have access to historic learning results
Data	Sourcing & Integration	Have access to very large, unstructured, or fast-moving data for analysis
Data	Sourcing & Integration	Be able to capture data from all sources and collect this data in a single repository
Data	Sourcing & Integration	Go to the source when data are not in the central database
Data	Sourcing & Integration	Link data warehouse to dynamic, learning management system data, and other forms of student experience across the campus
Data	Sourcing & Integration	Build mechanism for integration of existing data in a central repository, e.g., a data warehouse.
Data	Sourcing & Integration	Source data from the Contact Management System
Data	Sourcing & Integration	Source data from the Management Information System
Data	Sourcing & Integration	Source data from the Virtual Learning Environment
Data	Sourcing & Integration	Source data from the Enterprise Resource Planning (ERP) system
Data	Sourcing & Integration	Source the Contact Management System for, e.g., notes from study advisors.
Data	Sourcing & Integration	Source not only the Virtual Learning Environment but also systems of the administration department
Data	Sourcing & Integration	Source, for example, notes from chats with students.
Data	Sourcing & Integration	Collect data from the Management Information System and the Enterprise Resource Planning (ERP) system
Data	Sourcing & Integration	Extract data from the Management Information System
Data	Sourcing & Integration	Use administrative data
Data	Sourcing & Integration	Program the linking of data in, for example, R.
Data	Sourcing & Integration	Manually repair errors in linking tables.
Data	Sourcing & Integration	Realize that there are a lot of customizations that need to be done to the data from the original source.
Data	Sourcing & Integration	Take care that, when combining data sets, records are not doubled because, for example, students are counted twice.
Data	Sourcing & Integration	Be careful for correlation between imported variables.
Data	Sourcing & Integration	Realize that when linking tables are not updated, for example when the name of a degree program changes and this is not implemented in all tables, errors occur.
Data	Sourcing & Integration	Collect data from external educational sources and from various learning systems throughout your organization
Data	Sourcing & Integration	Continuously share and cooperate using external sources (data) in order to make predictions.
Data	Sourcing & Integration	Integrate data from other educational institutions and data sources.
Data	Sourcing & Integration	Integrate seamlessly educational data across multiple regions or facilities in near real time or real time.
Data	Sourcing & Integration	Integrate external data with internal to facilitate high-value analysis of our institutional environment.
Data	Sourcing & Integration	Integrate heterogeneous data from multiple learning systems and devices
Data	Sourcing & Integration	Build mechanism for sourcing data for learning analytics initiatives from multiple channels, including operational/transactional systems and third-party sources.
Data	Sourcing & Integration	Integrate learning analytics systems with operational/transactional systems at the process, technology and data levels in order to exploit the capabilities of both.
Data	Sourcing & Integration	Combine different types of data from all areas of the educational institution.
Data	Sourcing & Integration	Integrates data from different areas of the educational institution.
Data	Sourcing & Integration	Pull together data that comes from different places in the educational institution
Data	Sourcing & Integration	Integrate data from multiple internal sources into a data warehouse or mart for easy access
Data	Sourcing & Integration	Use numbers (ID numbers) to link data sets when all personal data are removed
Data	Sourcing & Integration	Make linking tables
Data	Sourcing & Integration	Link afterwards, like gender. These data come from other sources but can be included.
Data	Sourcing & Integration	To identifu students, different codes might need to be used.
Data	Sourcing & Integration	Link data
Data	Sourcing & Integration	Use linking tables
Management	Capability Development	Aggregate data to the right level
Management	Capability Development	Let learning analists have sessions together so they can better align how to report on results
Management	Capability Development	Build capacity to analyze and predict data value trends or sources from current indicators, patterns and context
Management	Capability Development	Decide with the learning analytics team how to report on results
Management	Capability Development	Let learning analists calculate whether results are significant, as users often don't ask this themselves.
Management	Capability Development	Develop ways of communication.
Management	Capability Development	Build the ability to reconfigure and leverage an organization’s learning analytics resources and capabilities in order to respond to changes in the business environment in a timely and efficient manner. Such responsiveness requires the ability to identify potential learning analytics opportunities (Search), prioritize those opportunities based on business need, risk and technology maturity (Selec…
Management	Capability Development	Build analytics capability
Management	Capability Development	Level the integration of data value into IT leadership and governance infrastructures
Management	Capability Development	Mature the learning analytics team
Management	Capability Development	Incorporate learning analytics into educational practices
Management	Capability Development	Revise the policy when learning analytics is used for new goals
Management	Capability Development	Define the role of learning analytics team
Management	Capability Development	Build the ability to evolve, adapt and orchestrate the data processes, support services and workflows towards value-based goals and outcomes
Management	Capability Development	The ability to enhance organizational management and technical skills about data value issues
Management	Capability Development	Evolve the organization based on data value considerations
Management	Capability Development	Provide lots of room for experimentation
Management	Capability Development	Transform the learning analytics activities
Management	Capability Development	Have confidence that learning analytics project proposals are properly appraised.
Management	Capability Development	Appoint specialists to lead learning analytics projects
Management	Capability Development	Identify required expertise (e.g., learning analytics expertise, IT expertise, statistical expertise, educational expertise, psychological expertise)
Management	Capability Development	Share knowledge now possessed by a single person, e.g. via protocols
Management	Capability Development	Be careful with advice as the learning analytics team doesn't know the contextual causality
Management	Capability Development	Let the learning analytics team decide for itself what competencies must be further developed
Management	Capability Development	Have sufficient contact with users
Management	Capability Development	Transf knowledge to the organization, for example via a business game
Management	Capability Development	Limit the level of detail of an analysis to come more towards the users' need
Management	Capability Development	We want for every stakeholder groups one person who truly understand it
Management	Capability Development	Limit the damage when a dataset is leaked by removing personal data
Management	Capability Development	Facilitate learning analytics through a enterprise‐wide system rather then software‐centric solutions
Management	Capability Development	Start with an institutional capability assessment encompassing dimensions such as institutional risk appetite, faculty perceptions, student consultation, data quality audit and technical capability
Management	Capability Development	Develop the ability to secure organizational mandate
Management	Capability Development	Bring together traditionally disparate organizational units within an institution in a project context that is fluid, rapidly changing, and relatively unchartered
Management	Capability Development	Build learning analytics capacity
Management	Capability Development	Do calculations centrally rather than locally, for example on a R server
Management	Capability Development	Use collaboration software like Slack to share knowledge
Management	Culture & readiness	Ensure that the administration largely accepts the use of analytics
Management	Culture & readiness	Ensure the faculty largely accept the use of analytics
Management	Culture & readiness	Have a 'learning analytics ambassador'.
Management	Culture & readiness	Support willingness to embed these processes and practices in daily work
Management	Culture & readiness	Change how key stakeholders perceive the project
Management	Culture & readiness	Change how something is done: how decisions are made, how learners are supported
Management	Culture & readiness	Demonstrate culture change through changed behavior.
Management	Culture & readiness	Make sustainable changes in the way student success is achieved or supported
Management	Culture & readiness	Ensure that learning analytics is recognized as crucial to research in teaching and learning
Management	Culture & readiness	Ensure that learning analytics is recognized as valuable by those who do teaching (instructors, instructional designers, curriculum committees)
Management	Culture & readiness	Let more and more people find learning analytics useful
Management	Culture & readiness	Show there is a latent need: people don't ask for it but they see it usefulness
Management	Culture & readiness	Convince people about the usefulness of learning analytics
Management	Culture & readiness	Get new ideas how to better support students ,thereby adding value compared to the old situation.
Management	Culture & readiness	Supress the feeling that when things go well, there is no urgency for change
Management	Culture & readiness	Have learning analytics be very widely implemented in an ecosystem that shares data
Management	Culture & readiness	Create a culture where formal authority, reputation, intuition and ad-hoc decision-making are preceded by decisions based on data
Management	Culture & readiness	Create a culture where learning analytics users, including power users, are encouraged to actively participate in the development of a data-driven environment
Management	Culture & readiness	Create a culture where whenever possible, assertions are substantiated with data
Management	Culture & readiness	Create a culture where although the emphasis is on fact-based decision making, there is still some room for intuition and ad-hoc decision-making, particularly when the required data is not available
Management	Culture & readiness	Create a data-driven mind-set
Management	Culture & readiness	Incorporate a data-driven mind-set in processes
Management	Culture & readiness	Create the feeling that people can override their own intuition when data contradict their viewpoints
Management	Culture & readiness	Create a feeling that people can base their decisions on data rather than on instinct
Management	Culture & readiness	Let people consider data a tangible asset
Management	Culture & readiness	Coach employees to make decisions based on data
Management	Culture & readiness	Create a culture that accepts the use of data to make decisions; we are not reliant on anecdote, precedent, or intuition
Management	Culture & readiness	Create a system that can generate arguments to support your feeling.
Management	Culture & readiness	Let learning analytics be accepted as a standard of practice
Management	Culture & readiness	Use formative feedback based rewards for staff (rather than summative performance indicators with penalties)
Management	Culture & readiness	Discourage teaching staff and students from gaming the system.
Management	Culture & readiness	Enable experimentation to discover needs
Management	Culture & readiness	Use learning analytics consistent with institutional practices
Management	Culture & readiness	Continuously assess and improve the business rules in response to insights extracted from data
Management	Culture & readiness	Have a process for moving from what the data say to making changes and decisions
Management	Culture & readiness	Create the ability to manage human, technological and process impacts across the organization arising from learning analytics initiatives. This involves the provision of training and rewards in order to demonstrate the value and utility of learning analytics
Management	Culture & readiness	Create the ability to manage human, technological and process impacts across the organization arising from learning analytics initiatives. This involves the provision of training and rewards in order to manage expectations
Management	Culture & readiness	Make everybody aware of the possibilities and start to expect learning analytics
Management	Culture & readiness	Create the ability to manage human, technological and process impacts across the organization arising from learning analytics initiatives. This involves the provision of training and rewards in order to encourage the adoption of new learning analytics technologies and work practices
Management	Culture & readiness	Measure the extent to which learning analytics permeated the fabric of an organization e.g. learning processes and values. Where appropriate, models are used to make decisions on an ongoing and pervasive basis
Management	Culture & readiness	Measure the extent to which learning has permeated the fabric of an organization e.g. learning processes and values (e.g. appreciation for learning analysis tools and data-driven insights). It is reflected in the extent to which people routinely use data and learning analytics tools to solve problems and make decisions.
Management	Culture & readiness	Realize that learning analytics capabilities are not transferable
Management	Culture & readiness	Embed processes and practices in the fabric of the institution and use them effectively.
Management	Culture & readiness	Use learning analytics to fit the organizational culture
Management	Culture & readiness	Change from thinking in terms of money and efficiency towards thinking in quality like student welfare and whether students learn what the job market expects from them
Management	Culture & readiness	Offer rewards for use to students and teachers that overcome inherent inertia and resistance
Management	Culture & readiness	Create the ability to manage human, technological and process impacts across the organization arising from learning analytics initiatives. This involves the provision of training and rewards in order to mitigate potential resistance
Management	Culture & readiness	Realize there might be resistance as learning analytics is applied to an unknown context
Management	Culture & readiness	Have complete support and recognition from the institution's senior leadership
Management	Culture & readiness	Develop strategies to engage leaders, promote buy‐in and change educational culture
Management	Culture & readiness	Embrace the whole system with guidance from key leadership
Management	Culture & readiness	Raise awareness and understanding of learning analytics among teaching staff and students through publicity and meetings/ workshops/ conferences.
Management	Culture & readiness	Let top-management promote the use of learning analytics in the organization.
Management	Culture & readiness	Have senior leaders who are interested in and committed to using data in making decisions
Management	Culture & readiness	Establish a culture where there is trust in data and the learning analytics tools used to analyze data
Management	Culture & readiness	Evaluate institutional culture (e.g., trust in data and openness to changes and innovation)
Management	Culture & readiness	Let learning analytics personnel across the organization foster a culture of open communication and trust between themselves and other users.
Management	Culture & readiness	Beware of events that lowers the trust in learning analytics
Management	Culture & readiness	Research what are reasons for people to distrust the data
Management	Culture & readiness	Get people to trust learning analytics
Management	Evidence-based & theory-driven	Advance pedagogies that educators value
Management	Evidence-based & theory-driven	Let learning analytics be driven by pedagogy
Management	Evidence-based & theory-driven	Identify reasons for learning improvement
Management	Evidence-based & theory-driven	Formulate questions for specific improvement, otherwise you get lost in the data
Management	Evidence-based & theory-driven	Blend learning analytics with proven best practice
Management	Evidence-based & theory-driven	Motivate faculty to make a change in their pedagogy because the evidence of impact on student learning is clear
Management	Evidence-based & theory-driven	Engage with existing learning analytics cases and literature.
Management	Evidence-based & theory-driven	Realize that the more nuanced the analyses are, the less evidence-based their outcome is
Management	Evidence-based & theory-driven	Don't be too nuances, otherwise it becomes less interesting for final users
Management	Evidence-based & theory-driven	Use existing evidence that could convince others of the need for change.
Management	Evidence-based & theory-driven	Develop a theoretical and conceptual foundation that unifies research from many disciplines interested in learning and teaching
Management	Evidence-based & theory-driven	Support learning analytics with (pedagogical) theory
Management	External environment	Collaborate with other institutions
Management	External environment	Consult external expertise
Management	External environment	Use relevant materials of a third party to formulate policy
Management	External environment	Visit relevant conferences
Management	External Environment	Compare with our rivals within the educational industry whether our organization has the foremost available analytics systems.
Management	External Environment	Research to what extent the 'suppliers' of your current students (secondary schools, higher eductational institutions) have implemented learning analytics
Management	External Environment	Research to what extent competitors have implemented learning analytics?
Management	External Environment	Research to what extent partners have implemented learning analytics?
Management	External Environment	Understand new market s
Management	External environment	Research whether there are influences or demands from government
Management	External environment	Identify students from other institutions, from who previous data is not known
Management	Funding & investment	Let funding for analytics be viewed as an investment in future outcomes rather than an incremental expense
Management	Funding & investment	Consider and estimate the time managers will need to spend overseeing the change.
Management	Funding & investment	Consider and project about how much these options will help end-users make quicker decisions.
Management	Funding & investment	Think about and estimate the cost of training that end-users will need.
Management	Funding & investment	Think about and estimate the effect they will have on the productivity of the employees’ work.
Management	Funding & investment	Have executive commitment to investing in new tools, solutions, and practices and especially in changing the culture and behaviors
Management	Funding & investment	Let financial resources be allocated by directors
Management	Funding & investment	Get management buy-in
Management	Funding & investment	Develop a human and fiscal resource investment plan, including a long-term commitment to launching, resourcing, scaling, and sustaining the effort
Management	Funding & investment	Account for limitations of time, resources, and/or budget
Management	Funding & investment	Have central investment
Management	Funding & investment	Create the ability of senior managers and executives to advocate the use of learning analytics systems and data-driven decision-making throughout the organization. This requires (iv) the provision of financial and material support for learning analytics initiatives
Management	Funding & investment	Be aware for a potential decrease in resources due to the inconvenience of sharing educational information about internal sources (data)
Management	Funding & investment	Evaluate financial capacity
Management	Funding & investment	Secure funding to hire personnel
Management	Funding & investment	Invest in additional personnel
Management	Funding & investment	Secure capital/financial resources
Management	Funding & investment	Secure adequate funding for learning analytics projects
Management	Funding & investment	Give learning analytics projects enough time to achieve their objectives
Management	Funding & investment	Make resources available to substantiate learning analytics
Management	Funding & investment	Seek funding
Management	Funding & investment	Avoid exceeding budgets
Management	Funding & investment	Be aware for time constrains
Management	Funding & investment	Seek an appropriate amount of funding for analytics
Management	Funding & investment	Hire an appropriate number of analysts for analytics
Management	Identifying Benefits	Identifiy the changes in organizational goals based on data value
Management	Identifying Benefits	Define targets at course level, not more detailed than that
Management	Identifying Benefits	Identify the key outcomes the organization is trying to improve with better use of data
Management	Identifying Benefits	Address the problems and requirements experienced during learning and teaching, rather than those of institutions and researchers
Management	Identifying Benefits	Demonstrate empirical impact on student success
Management	Identifying Benefits	Provide evidence of high improvements in learning experiences
Management	Identifying Benefits	Improve customer service/student care
Management	Identifying Benefits	Cluster populations to customize actions
Management	Identifying Benefits	Evaluate the program based on information
Management	Identifying Benefits	Have a chat with students with high risk of dropping out
Management	Identifying Benefits	Act early on problems later in the curriculum
Management	Identifying Benefits	Improve the curricula
Management	Identifying Benefits	Minimize workload through simple visualizations available to both faculty and students
Management	Identifying Benefits	Expose variability and improve performance
Management	Identifying Benefits	Improve the quality of work
Management	Identifying Benefits	Improve planning
Management	Identifying Benefits	Make work more efficient
Management	Identifying Benefits	Demonstrate value (ROI) to institutions that do not have retention or performance issues
Management	Identifying Benefits	Use internal resources (data) to decrease management costs and time for planning and education
Management	Identifying Benefits	Lower costs
Management	Identifying Benefits	Share information about internal sources (data) to reduces educational costs.
Management	Identifying Benefits	Grow sales to new customers or new markets
Management	Identifying Benefits	Identify new product/service opportunities
Management	Identifying Benefits	Innovate through new business models, products, and services
Management	Implementation, Deployment & Application	Deploy learning analytics in a systemic manner with the needs of varying stakeholders accounted for
Management	Implementation, Deployment & Application	Consider contextual elements (e.g., institutional size, structure) to identify opportunities for learning analytics
Management	Implementation, Deployment & Application	Develop a plan that prioritizes selected stakeholders and purposes
Management	Implementation, Deployment & Application	Identify areas where different stakeholders will be supported by learning analytics (macro level –institution, meso level –department/ programme, and micro level –teaching staff and students)
Management	Implementation, Deployment & Application	Identify expected ‘changes’ to the current context and key stakeholders (e.g., teaching staff and students)
Management	Implementation, Deployment & Application	Make learning analytics specific for the different degree programs
Management	Implementation, Deployment & Application	Let the learning analytics team have a serving purpose
Management	Implementation, Deployment & Application	Continuously evaluate and make adjustments to the work of the learning analytics team
Management	Implementation, Deployment & Application	Have a short adaption cycle, so nobody tends to do things themselves
Management	Implementation, Deployment & Application	Spend time to reflect on what users really want
Management	Implementation, Deployment & Application	Implement learning analytics bottom up
Management	Implementation, Deployment & Application	Enable implementation that recognizes the complexity of educational systems
Management	Implementation, Deployment & Application	Recognize the need for cross‐institutional understanding, skills upgrades, and acceptance when implementing learning analytics
Management	Implementation, Deployment & Application	Realize that at first, the technical and privacy aspects make it hard to start learning analytics project
Management	Implementation, Deployment & Application	Consider phases of implementation (e.g., explore data, carry out pilot projects, seek feedback from users, and develop a policy for the adoption of learning analytics).
Management	Implementation, Deployment & Application	Evaluate risks
Management	Implementation, Deployment & Application	Mind inadvertent consequences and make sure the benefits of learning analytics to students outweigh risks
Management	Implementation, Deployment & Application	Plan a learning design strategy to maximize production of meaningful data
Management	Implementation, Deployment & Application	Make learning analytics projects practical and implementable, e.g. not just narrow research but lending itself to system/program design and delivery
Management	Implementation, Deployment & Application	Make a preliminary action plan and timelines which can be reviewed and modified as needed.
Management	Implementation, Deployment & Application	Create top-management support for learning analytics initiatives within your organization?
Management	Implementation, Deployment & Application	Enforce adequate plans for the introduction and utilization of learning analytics.
Management	Implementation, Deployment & Application	Frequently adjust learning analytics plans to adapt to changing conditions
Management	Implementation, Deployment & Application	Have a list of things to do for the institution
Management	Implementation, Deployment & Application	Make a planning, so everybody can see when which theme is worked on
Management	Implementation, Deployment & Application	Make a planning per year, including organizational goals
Management	Implementation, Deployment & Application	Perform the learning analytics planning processes in systematic and formalized ways.
Management	Implementation, Deployment & Application	Use version control, so you can go back in case a mistake is made
Management	Implementation, Deployment & Application	Write a project proposal
Management	Implementation, Deployment & Application	Integrate learning analytics in daily learning events
Management	Implementation, Deployment & Application	Integrate learning analytics into the environments, practices and processes of teachers and students
Management	Implementation, Deployment & Application	Integrate learning analytics with the work practices of educators
Management	Implementation, Deployment & Application	Reflect the complexity and multi‐dimensionality of teaching and learning practices
Management	Implementation, Deployment & Application	Consider whether there is political interest in change, and how key decision makers may perceive the problem(s) that learning analytics could address and/or the proposed solutions
Management	Implementation, Deployment & Application	Embedded learning analytics in existing functions
Management	Implementation, Deployment & Application	Engage with research projects locally or through collaboration with other institutions
Management	Implementation, Deployment & Application	Identify opportunities to build learning analytics upon existing projects or practice.
Management	Implementation, Deployment & Application	Have a value-centric data process design and integration of data value considerations into wider organizational processes
Management	Implementation, Deployment & Application	Decide on forms of interventions (e.g., automatic systems, personal contacts, learning resources)
Management	Implementation, Deployment & Application	Plan strategies to intervene at points identified in the context‐mapping work
Management	Performance monitoring	Perform a policy, processes, and practices audit
Management	Performance monitoring	Develop methods to triangulate analytics results
Management	Performance monitoring	Build organizational capacity to create a data value-based control loop that feeds into organizational level decisions
Management	Performance monitoring	Not just encourage but orchestrate and measure student success, with a focus on continuously improving results
Management	Performance monitoring	Support data value assessment and reporting at all stages in the data value chain
Management	Performance monitoring	Constantly monitor the performance of the learning analytics function.
Management	Performance monitoring	Establish indicators of data quality and system efficacy
Management	Performance monitoring	Establish qualitative and quantitative indicators of success
Management	Performance monitoring	Be clear about the learning analytics performance criteria.
Management	Performance monitoring	Set up measurable milestones
Management	Policies & CoP	Consult relevant policies and codes of practice (e.g., Jisc’s Code of Practice for Learning Analytics, and data protection policies)
Management	Policies & CoP	Describe the aims of learning analytics at the institution in a Code of Practice
Management	Policies & CoP	Have a Code of Practice to make clear what is done with learning analytic
Management	Policies & CoP	Check wether the original policy objectives and vision are still accurate and relevant in the light of the assessment of context, purposes, and capacity
Management	Policies & CoP	Change written policy with regard to evidence‐based support of learners
Management	Responsibility & accountability	Create independent learning analytics units
Management	Responsibility & accountability	Enhance learning analytics through the provision of some authoritative autonomy and financial independence, which provides learning analytics managers with a degree of freedom to pursue value-creating actions.
Management	Responsibility & accountability	Split learning analytics across multiple organizational units
Management	Responsibility & accountability	Control learning analytics projects centralized
Management	Responsibility & accountability	Control learning analytics projects decentralized
Management	Responsibility & accountability	Establish a diverse working group (including teaching staff and students) and define a clear leadership structure
Management	Responsibility & accountability	Have complete new learning analytics activities approved by the board, with the freedom to make minor changes to the current concept.
Management	Responsibility & accountability	Be aware of whom is deciding where money is spend on, for example, the educational director
Management	Responsibility & accountability	Define a role for the learning analytics team: are they internal consultants or just the data suppliers?
Management	Responsibility & accountability	Assign decision rights and responsibilities by determining; those who will be held accountable for the resulting actions and outcomes of these decisions. It is important that a person responsible for making a certain decision is held accountable for the resulting actions and outcomes
Management	Responsibility & accountability	Assign decision rights and responsibilities by determining; those responsible for making certain decisions in relation to the planning, implementation and applications of learning analytics
Management	Responsibility & accountability	Assign decision rights and responsibilities by determining; where appropriate, those who will provide the input for such decisions.
Management	Responsibility & accountability	Let the learning analytics team agree on the role they have
Management	Responsibility & accountability	Specify who is responsible for learning analytics development
Management	Responsibility & accountability	Ensure every member of the learning analytics team can do multiple jobs, as roles within the team can change.
Management	Responsibility & accountability	Manage access rights, for example via the IT department
Management	Responsibility & accountability	Let the privacy officer make sure everything that is done is allowed.
Management	Responsibility & accountability	Let the security officer check whether everything the learning analytics team does is done in a secure way.
Management	Responsibility & accountability	Made a planning, so everybody can see when a specific theme is worked on.
Management	Responsibility & accountability	Specifiy what the position of the learning analytics team within the organization is; what can they do and what not
Management	Responsibility & accountability	Don't have the learning analytics team act too much as consultant as they are not the substantive expert
Management	Responsibility & accountability	Describe what is inside a algorithm, as this is demanded by privacy regulation
Management	Responsibility & accountability	Let have the learning analytics team look into whether a difference is significant or not, as policymakers often do not ask this themselves.
Management	Responsibility & accountability	Carefully consider the advice the learning analytics team gives and also make sure people don't interpret the analyses too firmly
Management	Responsibility & accountability	Promise that data is collected in a reliable and reproducible way, that the analyses are valid, and that analyses are delivered in the form of a report.
Management	Responsibility & accountability	Don't give mere advice based on what is discovered but point out interesting insights and ask users to think about that themselves.
Management	Responsibility & accountability	Let the academic advisors contact students
Management	Responsibility & accountability	Let the focal department act upon the insights gained from learning analytics
Management	Responsibility & accountability	Let the organization act upon insights given by the learning analytics team.
Management	Responsibility & accountability	Have tutors and academic advisors look further than the dashboard and ask deeper questions.
Management	Responsibility & accountability	Don't have the learning analytics team involved in the operational part, that is, which students should be contacted now.
Management	Strategy	Align with organizational design
Management	Strategy	Let learning analytics be integrated into the long term planning that drives the institution
Management	Strategy	Meet identified institutional needs
Management	Strategy	Transform organizational design
Management	Strategy	Alignm the organization’s learning analytics initiatives with its business strategy. It is a two-way relationship in the sense that learning analytics initiatives can help measure and enforce a business strategy, whilst business strategy necessarily shapes learning analytics initiatives as they evolve. This requires a clearly defined business strategy that is enunciated to all staff and translate…
Management	Strategy	Identify the university’s learning and teaching strategies
Management	Strategy	Let the long‐term institutional goals include the implementation of analytics strategies, tools, and processes to serve multiple stakeholders
Management	Strategy	Prioritize stakeholders and goals realistically in order to meet institutional goals,
Management	Strategy	Continuously examine the innovative opportunities for the strategic use of learning analytics.
Management	Strategy	Make a planning for a year, including organizational goals
Management	Strategy	Align learning analytics with the wider institutional strategies or introduce learning analytics into the university’s strategy
Management	Strategy	Identify important business insights and trends to improve educational services
Management	Strategy	Identify internal and external drivers for learning analytics (e.g., problems to solveor areas to enhance).
Management	Strategy	Let learning analytics help developing organizational policy
Management	Strategy	To what extent has the top-management promoted learning analytics as a strategic priority within your organization?
Management	Strategy	Create the ability of senior managers and executives to advocate the use of learning analytics systems and data-driven decision-making throughout the organization. This requires a clear vision
Management	Strategy	Create the ability of senior managers and executives to advocate the use of learning analytics systems and data-driven decision-making throughout the organization. This requires the promotion of this vision and understanding throughout the organization
Management	Strategy	Identification of longer-term data acquisition, data architecture, system integration, IS priorities, business process and people required
Management	Strategy	Create the ability to specify sources of value for a specific organization
Management	Strategy	Have program directors on board to ease the change of program-specific policies
People	Collaboration	Let individuals with access to policy makers use their connection to reach out to important stakeholders.
People	Collaboration	Let an expert, e.g., a mathematics professor, checks the used methods
People	Collaboration	Invite other institutions to do an 'internship' with to learn about what done with regards to learning analytics or vivce versa
People	Collaboration	Have different departments and levels of the organization come together to discuss matters
People	Collaboration	Involve different scientists
People	Collaboration	Get support from experts like a mathematics professor
People	Collaboration	Have intake interviews to make sure the learning analytics team on the same level as the principle of a learning analytics related project
People	Collaboration	Inform principles of learning analytics related projects when they request for learning analytics will be handled and what we are going to do.
People	Collaboration	Involve scientists when conducting experiments, so they can publish papers about it.
People	Collaboration	Have the dean and even the board reading reports first before publishing.
People	Collaboration	Have contact with principles of learning analytics related projects all the time, otherwise things go wrong
People	Collaboration	Let the learning analytics team have frequently short meetings to share what they are working on
People	Collaboration	Let team members of the learning analtics team identify what they find important to write in learning analytics reports
People	Collaboration	Make "openness" a priority so that models, data, and best practices can be shared across institutions
People	Collaboration	Extent to which learning analytics has permeated the fabric of an organization e.g. business processes and values. It is facilitated by sharing metadata and the use of a collaboration portal.
People	Collaboration	Realize that for users alone, the whole learning analytics process is too complex to fully understand
People	Collaboration	Proposed to other users to help them and also collaborate with the learning analytic team
People	Collaboration	Let learning analysts and line people coordinate their efforts harmoniously.
People	Collaboration	Involve all types of learning analytics users, from managers to operational staff, in the initial planning of a learning analytics initiative
People	Collaboration	Have analytics personnel work closely with users and maintain productive user/client relationships.
People	Collaboration	Let the learning analytics team work together with the users to show and explain them what is done
People	Collaboration	Let the learning analytics team think along with the users about their needs
People	Collaboration	Continuously communicate between users and learning analytics team
People	Collaboration	Work together with the users
People	Collaboration	Enable that users can ask questions to the learning analytics team.
People	Combined Skills & Knowledge	Let academic advisors have their own way of identifying and contacting students
People	Combined Skills & Knowledge	Interpret it in the right way
People	Combined Skills & Knowledge	Realize that not everybody fully understands the outcomes, as many people are used to make decisions on a table from the management information system and their own interpretations
People	Combined Skills & Knowledge	Have stakeholders understand how the system works, otherwise they might just copy it to Excel so they can do their own analyses.
People	Combined Skills & Knowledge	Realize that the users do not always find the data and dashboard easy to understand and to use
People	Combined Skills & Knowledge	Provide users with knowledge about the dashboard so they can do more with is
People	Combined Skills & Knowledge	Develop combined skills and knowledge of learning analytics managers and other learning analytics users throughout the organization to (iii) create and promote a technical innovation team
People	Combined Skills & Knowledge	Develop combined skills and knowledge of learning analytics managers and other learning analytics users throughout the organization to (iv) an innovation forum made up of innovation teams from other business units.
People	Combined Skills & Knowledge	Evaluate human capacity (e.g., data literacy, relevant expertise, staff workload, opportunities for skill transfer)
People	Combined Skills & Knowledge	Have a mix of hands-on people, people who knows how to write articles, and people with business intelligence experience
People	Combined Skills & Knowledge	Have teams comprise specialists whose skills are complementary to other team members
People	Combined Skills & Knowledge	Have learning analytics managers who are able to coordinate learning analytics-related activities in ways that support other functional managers, suppliers, and students
People	Combined Skills & Knowledge	Have learning analytics managers who are able to work with functional managers, suppliers, and customers to determine opportunities that learning analytics might bring to our institution
People	Combined Skills & Knowledge	Let the data scientist do the analyses and have the business analyst writing the story around it
People	Combined Skills & Knowledge	Write a protocol to prevent only one person having a the specific knowledge
People	Combined Skills & Knowledge	Be able to acquire new and relevant knowledge
People	Combined Skills & Knowledge	Be able to apply relevant knowledge
People	Combined Skills & Knowledge	Be able to assimilate relevant knowledge
People	Combined Skills & Knowledge	Be able to search for new and relevant knowledge
People	Combined Skills & Knowledge	Make concerted efforts for the exploitation of existing competencies and exploration of new knowledge.
People	Combined Skills & Knowledge	Develop combined skills and knowledge of people in learning analytics related management roles throughout the organization to prioritize and manage learning analytics projects
People	Combined Skills & Knowledge	Have learning analytics personnel who are very capable in terms of managing project life cycles.
People	Combined Skills & Knowledge	Have learning analytics personnel who are very capable in terms of planning and executing work in a collective environment.
People	Combined Skills & Knowledge	Have learning analytics personnel who are very capable in terms of planning, organizing, and leading projects.
People	Combined Skills & Knowledge	Perform project evaluation
People	Combined Skills & Knowledge	Develop combined skills and knowledge of people throughout the organization that are involved in the business side of learning analytics initiatives, that also includes the ability to network
People	Combined Skills & Knowledge	Develop combined skills and knowledge of people in learning analytics related management roles throughout the organization to translate, communicate and sell the potential values and benefits of learning analytics to senior executives (e.g. senior executives and general managers).
People	Combined Skills & Knowledge	Have institutional research professionals who know how to support analytics
People	Combined Skills & Knowledge	We have IT processionals who know how to support analytics
People	Combined Skills & Knowledge	Have skilled resources
People	Combined Skills & Knowledge	Have learning analytics staff with the right skills to accomplish their jobs successfully
People	Combined Skills & Knowledge	Have learning analytics staff that holds suitable work experience to accomplish their jobs successfully
People	Combined Skills & Knowledge	Have dedicated professionals who have specialized analytics training
People	Combined Skills & Knowledge	Hire new employees that already have learning analytics skills
People	Combined Skills & Knowledge	Create the ability of senior managers and executives to advocate the use of learning analytics systems and data-driven decision-making throughout the organization. This requires first-hand experience and understanding of the benefits and successes of learning analytics
People	Combined Skills & Knowledge	Have evidence of knowledge of the field of learning analytics
People	Combined Skills & Knowledge	Have one person for each group of stakeholders who truly understands it all.
People	Combined Skills & Knowledge	Have analytics personnel that is very knowledgeable about the role of learning analytics as a means, not an end
People	Combined Skills & Knowledge	Have learning analytics managers that are able to understand and evaluate the output extracted from learning analytics
People	Combined Skills & Knowledge	Realize that a lot of people don't know the difference between anonymizing and pseudonymising data
People	Combined Skills & Knowledge	Develop combined skills and knowledge of learning analytics technology specialists across the organization including; programming, optimization software, algorithms, database/file management, ETL (Extraction, Transformation and Loading), data warehousing, software development methodologies and high level architectures. Some level of business domain and industry knowledge is necessary to apply the…
People	Combined Skills & Knowledge	Have learning analytics staff that can do data manipulation
People	Combined Skills & Knowledge	Have learning analytics staff that that can program
People	Combined Skills & Knowledge	Have learning analytics personnel that is very capable in terms of programming skills.
People	Combined Skills & Knowledge	Have learning analytics personnel that is very capable in the areas of data and network management and maintenance.
People	Combined Skills & Knowledge	Have learning analytics staff that can program, for example in R
People	Combined Skills & Knowledge	Realize that a lot of people don't know the difference between anonymizing and pseudonymising data
People	Combined Skills & Knowledge	Let stakeholders have understanding of analytics design and development
People	Combined Skills & Knowledge	Let stakeholders have understanding of data science
People	Combined Skills & Knowledge	Even when the data are visualized in a good way, ensure that people know what they are looking at
People	Combined Skills & Knowledge	Let stakeholders have understanding of qualitative analysis
People	Combined Skills & Knowledge	Increase statistical knowledge
People	Combined Skills & Knowledge	Increase knowledge about text mining
People	Combined Skills & Knowledge	Have the right statistical knowledge
People	Combined Skills & Knowledge	Ensure that learning analytics staff is able to interpret a boxplot
People	Combined Skills & Knowledge	Learning analytics team members need to know what they are doing scientifically
People	Combined Skills & Knowledge	Ensure that learning analytics staff are very knowledgeable about educational functions.
People	Combined Skills & Knowledge	Ensure that learning analytics staff are very knowledgeable about the learning environment.
People	Combined Skills & Knowledge	Ensure that learning analytics managers have a good sense of where to apply learning analytics
People	Combined Skills & Knowledge	Ensure that learning analytics staff are very capable in terms of teaching others
People	Combined Skills & Knowledge	Collaborate educational experts, as they know a lot about higher education and often have good ideas
People	Combined Skills & Knowledge	Collaborate with experts on how to effectively write an articles
People	Combined Skills & Knowledge	Let have learning analytic team members understand data visualization
People	Combined Skills & Knowledge	Let have learning analytic team members understand institutional reporting and/or business intelligence
People	Combined Skills & Knowledge	Let have learning analytic team members understand learning analytics reporting
People	Combined Skills & Knowledge	Ensure that analytic tools are only used by people with sufficient understanding of how they work so that the results can be treated with an appropriate level of skepticism
People	Combined Skills & Knowledge	Let learning analytic team members have ability to use automated support processes for student success
People	Combined Skills & Knowledge	Let have learning analytic team members understand database development
People	Combined Skills & Knowledge	Let have learning analytic team members understand front‐end / interface development
People	Combined Skills & Knowledge	Let have learning analytic team members understand IT support
People	Combined Skills & Knowledge	Let have learning analytic team members understand learning technologies administration
People	Combined Skills & Knowledge	Ensure that learning analytics staff posess superior understanding of technological trends.
People	Combined Skills & Knowledge	Ensure that learning analytics staff posess superior ability to learn new technologies.
People	Combined Skills & Knowledge	Ensure that learning analytics staff have the sufficient technical expertise to understand the data available to them and communicate with learning analytics technical specialists
People	Combined Skills & Knowledge	Ensure that people throughout the organization, that are involved in the business side of learning analytics initiatives, also posess the ability to seek out opportunities and threats.
People	Combined Skills & Knowledge	Ensure that people throughout the organization, that are involved in the business side of learning analytics initiatives, also posess the ability to develop and drive an agenda.
People	Combined Skills & Knowledge	Encourage learning analytics managers and other learning analytics users throughout the organization to continually challenge the status quo
People	Combined Skills & Knowledge	Ensure that learning analytics managers and other learning analytics users, throughout the organization, manage new innovation as a separate activity to continuous improvement
People	Combined Skills & Knowledge	Let learning analytics related management roles throughout the organization redesign business processes as a result of implementing learning analytics
People	Combined Skills & Knowledge	Ensure that people throughout the organization, that are involved in the business side of learning analytics initiatives, know the depth of domain knowledge of the organization’s key products, services, processes, value chain and industry in general.
People	Combined Skills & Knowledge	Ensure that people throughout the organization, that are involved in the business side of learning analytics initiatives, know fundamental business principles,
People	Combined Skills & Knowledge	Let have stakeholders understand data governance development and management
People	Combined Skills & Knowledge	Let have stakeholders understand data policy development and implementation
People	Combined Skills & Knowledge	Let have stakeholders understand engagement/management
People	Combined Skills & Knowledge	Let have stakeholders build an entrepreneurial mindset and vision and the ability to rationally assess risks and benefits.
People	Combined Skills & Knowledge	Ensure that analytics personnel are very knowledgeable about the critical factors for the success of our organization.
People	Combined Skills & Knowledge	Ensure that analytics personnel understand our organization’s policies and plans at a very high level.
People	Combined Skills & Knowledge	Ensure that learning analytics managers are able to anticipate the future business needs of functional managers, suppliers, and students
People	Combined Skills & Knowledge	Ensure that learning analytics managers understand and appreciate the needs of other functional managers, suppliers, and customers.
People	Combined Skills & Knowledge	Ensure that learning analytics personnel are very capable in interpreting business problems and developing appropriate technical solutions
People	Combined Skills & Knowledge	Be careful with providing advice if the causality is not clear.
People	Combined Skills & Knowledge	Have learning professionals who know how to apply analytics to their area
People	Combined Skills & Knowledge	Ensure that the context the data is coming from is identified
People	Combined Skills & Knowledge	Ensure that you include contextual knowledge before drawing conclusion
People	Communication	Signal remarkable things, so the users can think for themselves why this is.
People	Communication	Don't just give insights and let people do the rest of the work themselves but collaborate to make the best from it
People	Communication	Discuss how things work
People	Communication	Discuss with people who work in that specific context how things work
People	Communication	Create a culture of open communication and trust that involves listening carefully to the needs of users and translating learning analytics concepts into every-day language. It is facilitated by close and frequent contact via a variety of different communication channels
People	Communication	Understand each other so things can be done better
People	Communication	Conduct an intake interview with the principle to make sure we are aligned before beginning a project
People	Communication	Discuss with stakeholders how they see the output of analysis
People	Communication	Be able to offer different things depending on who the learning analytics team
People	Communication	Ask users to inform the learning analytics team when they see strange things
People	Communication	Keep communicating with users whether they want things different in (e.g.) dashboards that are designed
People	Communication	Keep in touch with principles of learning analytics related project and validate their questions to make sure the learning analytics team researches exactly what they want.
People	Communication	Let comprehensibility for users not come at the expense of detail in analyses.
People	Communication	Let the learning analytics team write manuals to increase clarity in communication
People	Communication	Ensure that users understand why we make a dashboard
People	Communication	Give a lot of internal workshops
People	Communication	Use different graphs for different degree programs
People	Communication	Justify models in the texts
People	Communication	Change how information is communicated and shared
People	Communication	Establish communication channels between different stakeholders across the institution.
People	Communication	Test your findings statistically before they are shared with stakeholders
People	Communication	Let information be widely shared between the learning analytics team and line people so that those who make decisions or perform jobs have access to all available know-how.
People	Communication	Let the learning analytics team and line people from various departments, frequently attend cross-functional meetings.
People	Communication	Let the learning analytics team and line people meet frequently to discuss important issues both formally and informally.
People	Communication	Identify communications bottlenecks within our organization when sharing analytics insights.
People	Communication	Enable users to ask the learning analytics team to build a specific dashboard
People	Communication	Have more and more people come with specific questions
People	Communication	Enable users to ask the learning analytics team for specific information
People	Communication	Be able to provide clear answers to users who come with specific questions.
People	Stakeholder Identification & Engagement	Let learning analytics be co‐designed with educators who understand what good learning looks like in their field
People	Stakeholder Identification & Engagement	Engage all stakeholders involved in teaching, learning, and governance of educational systems
People	Stakeholder Identification & Engagement	Involve students in the design and validation of new tools, possibly with pedagogical benefits to the students
People	Stakeholder Identification & Engagement	Set up a feedback session with students, tutors, academic advisors and other interested people
People	Stakeholder Identification & Engagement	Ensure broad stakeholder engagement
People	Stakeholder Identification & Engagement	Consider responsibilities and implications for all stakeholders
People	Stakeholder Identification & Engagement	iInform strategic planning and the design of approaches to involve, inform, support and train key players
People	Stakeholder Identification & Engagement	Invite teaching staff to contribute their professional knowledge to the design and implementation of learning analytics(e.g., guide students to reflect on possible ways to act on the results of analytics)
People	Stakeholder Identification & Engagement	Ensure continuous communication between users and learning analysts
People	Stakeholder Identification & Engagement	Keep contact with faculties within the institution
People	Stakeholder Identification & Engagement	Identify academic advisors who can use learning analytics
People	Stakeholder Identification & Engagement	Identify academic advisors, policymakers, and communication staff who can use learning analytics
People	Stakeholder Identification & Engagement	Identify learning analytics ambassador
People	Stakeholder Identification & Engagement	Identify faculty directors who can support the use of learning analytics
People	Stakeholder Identification & Engagement	Identify academic teams (e.g. Learning & Teaching committee, Digital Learning Committee, research project teams)
People	Stakeholder Identification & Engagement	Identify external partners (e.g., researchers and service providers)
People	Stakeholder Identification & Engagement	Identify internal advocates of learning analytics among members of faculties (bottom-up approach).
People	Stakeholder Identification & Engagement	Identify primary users of learning analytics (e.g., students, teaching staff, and senior managers).
People	Stakeholder Identification & Engagement	Identify professional teams (e.g., IT, legal team, strategy team, Student Support, Student Registry, library).
People	Stakeholder Identification & Engagement	Identify senior management team (e.g., vice-chancellors, principals, provosts).
People	Stakeholder Identification & Engagement	Identify important policymakers
People	Stakeholder Identification & Engagement	Identify the privacy officer
People	Stakeholder Identification & Engagement	Identify privacy and security officers
People	Stakeholder Identification & Engagement	Identify relevant scientific personnel
People	Stakeholder Identification & Engagement	Identify relevant staff and students
People	Stakeholder Identification & Engagement	Identify students to involve in learning analytics development
People	Stakeholder Identification & Engagement	Involve the University Student Board in learning analytics development
People	Stakeholder Identification & Engagement	Involve the University Student Board and Works Council in learning analytics development
People	Stakeholder Identification & Engagement	Know where to get people with the right skills and knowledge
People	Training	Let learning analytics staff write instructional manuals.
People	Training	Regularly update instructional manuals and video's
People	Training	Construct manuals in such way that rewriting the entire manual again is not necessary in case of minor changes.
People	Training	Provide training like statistics courses.
People	Training	Ensure that learning analytics staff has suitable education to fulfill their jobs
People	Training	Ensure that learning analytics staff is well trained.
People	Training	Organize courses together with people from, for example, the math faculty.
People	Training	Let the learning analytics team decides what skills and knowledge need further development.
People	Training	Ensure that subject matter of statistics courses is easily applicable for learning analytics staff to mitigate the degradation of knowledge over time.
People	Training	Get education from members of the math faculty about how to perform certain analyses.
People	Training	Let learning analytics staff earn relevant diplomas or certificates.
People	Training	Make a training program, have a subscription on online courses, and follow lectures and conferences.
People	Training	Realize that learning analytics involve alot of on-the-job-training.
People	Training	Provide training for users (e.g., how to operate the tools, how to interpret data, how to transfer data into action).
People	Training	Let the learning analysts walk the users through the analysis and explain everything.
People	Training	Train the tutors and academic advisors on how to interpret our reports.
People	Training	Provide learning analytics training to our own employees
People	Training	Support users in the use of a dashboard
Privacy & Ethics	Ethics	It is important to understand what you want to do instead of what you can do.
Privacy & Ethics	Ethics	Understand the ethical considerations
Privacy & Ethics	Ethics	Have policies on ethical use of data and effective systems of data governance in place first
Privacy & Ethics	Ethics	Anticipate ethical dilemmas, establish a data policy and governance processes
Privacy & Ethics	Ethics	Consider establishing an ethics committee
Privacy & Ethics	Human decision-making	Account for the human dimensions of analytics, not only Artificial Intelligence/Machine Learning models
Privacy & Ethics	Human decision-making	Produce reports/displays that are actionable by educators and students
Privacy & Ethics	Human decision-making	Only inform and not make decisions from an algorithm without human evaluation (danger of creating a data driven self‐fulfilling prophecy education system)
Privacy & Ethics	Legal compliance	Ensure that data is anonymized
Privacy & Ethics	Legal compliance	Use pseudonymization to make data as unrecognizable as possible
Privacy & Ethics	Legal compliance	Do not export notes from meetings with academic advisors, as these are confidential.
Privacy & Ethics	Legal compliance	Do not use personal data for learning analytics purposes
Privacy & Ethics	Legal compliance	Exclude personal data that is irrelevant and ask for consent.
Privacy & Ethics	Legal compliance	Split data sets so different users see different parts of the data.
Privacy & Ethics	Legal compliance	Before working on a dataset, ask the supplier to remove all unnecessary information.
Privacy & Ethics	Legal compliance	Make clear if third parties will get access to the collected data at any point
Privacy & Ethics	Legal compliance	We asked consent and explained for what exact reasons data were collected.
Privacy & Ethics	Legal compliance	Explain what an algorithm does
Privacy & Ethics	Legal compliance	Allow students to delete any optional/personally supplied information
Privacy & Ethics	Legal compliance	Evaluate existing legal framework and its applicability for learning analytics
Privacy & Ethics	Legal compliance	Ensure that everything needs to be in line with privacy.
Privacy & Ethics	Legal compliance	Ensure that students have the right to be forgotten.
Privacy & Ethics	Legal compliance	Define what an algorithm may do from a privacy perspective
Privacy & Ethics	Legal compliance	Ask for consent
Privacy & Ethics	Security	Let authorization of access to the network drive be managed by one of the learning analysts
Privacy & Ethics	Security	Guarantee the security of the data
Privacy & Ethics	Security	Have information security policies and practices that are sufficiently robust to safeguard the use of data for analytics
Privacy & Ethics	Security	Have policies that specify rights and privileges regarding access to institutional and individual data
Privacy & Ethics	Transparency	Explain what an algorithm does
Privacy & Ethics	Transparency
Privacy & Ethics	Transparency
Privacy & Ethics	Transparency
Privacy & Ethics	Transparency
Technology	Automation	Automate a process for continuous student monitoring
Technology	Automation	Write a script for everything that is done with data
Technology	Automation	Much is automated, also the delivery of new data sets
Technology	Automation	Automate processes so when a new data set arrives, the scripts automatically use that new data
Technology	Automation	Use an order in which scripts are executed
Technology	Automation	Automate as much as possible so people don't need to spend time on processing data
Technology	Automation	Automate the reading, manipulating, and linking of data, and the making of new models
Technology	Automation	Conduct automatic checks after each step of data processing
Technology	Automation	Automatically check all data sets.
Technology	Automation	Use an automatic method of maintaining data consistency.
Technology	Automation	Reduce human error by automating processes
Technology	Automation	Automatically notify users of critical issues.
Technology	Connectivity	Connect all remote, branch, and mobile offices to the central office for analytics
Technology	Connectivity	Enable sharing of seamless Analytics-driven information across your organization, regardless of the location.
Technology	Connectivity	Utilize open systems network mechanisms to boost analytics connectivity.
Technology	Connectivity	Always be be connected with the network drive
Technology	Connectivity	be available as a service that works with the institution's other student systems
Technology	Connectivity	When other institutions use different systems, exchange of data is difficult
Technology	Connectivity	Allow the information to be shared in the cloud-based data warehouse with other institutions
Technology	Infrastructure	Use Learning Management Systems like Canvas as data source
Technology	Infrastructure	Use a Learning Management System as data source
Technology	Infrastructure	Use Management Information Systems as data source
Technology	Infrastructure	Use Enterprise Resource Planning systems like SAP as data source
Technology	Infrastructure	Use Management Information Systems and Enterprise Resource Planning systems as data sources
Technology	Infrastructure	Build a dashboard in, for example, Tableau
Technology	Infrastructure	Use Tableau for visualisations
Technology	Infrastructure	Generate detailed reporting in visual ways
Technology	Infrastructure	Explore or adopt different data visualization tools
Technology	Infrastructure	Store data in data warehouses
Technology	Infrastructure	Implement a Enterprise Data Warehouse (EDW). These provides ease of access to data and therefore can facilitate wide access to data analyses and reports
Technology	Infrastructure	Store student data into appropriate databases
Technology	Infrastructure	Ensure sufficient capacity to store, manage, and analyze increasingly large volumes of data
Technology	Infrastructure	Actively deploy new information technologies such as Supplier Relationship Management (SRM)
Technology	Infrastructure	Take advantage of new information technologies such as remote conferencing.
Technology	Infrastructure	Explore or adopt cloud-based services for processing data and performing analytics
Technology	Infrastructure	Explore or adopt new forms of databases such as Not Only SQL (NoSQL) for storing data.
Technology	Infrastructure	Explore or adopt parallel computing approaches (e.g., Hadoop) to big data processing
Technology	Infrastructure	Develop and utilize quantitative and qualitative analysis tools (e.g. statistical analysis, data mining, text mining and predictive analysis) to facilitate the semi-automated analysis of numerical, semi-structured and unstructured data to discover new actionable insights from patterns in the data
Technology	Infrastructure	Develop and utilize quantitative and qualitative analysis tools (e.g. statistical analysis, data mining, text mining and predictive analysis) to facilitate the semi-automated analysis of numerical, semi-structured and unstructured data to extrapolate patterns found in the data to predict what is likely to occur in the future. These tools are particularly useful for addressing less structured prob…
Technology	Infrastructure	Use programming languages like R
Technology	Infrastructure	Use R and Tableau
Technology	Infrastructure	Recognize the distributed architecture of interactions and not attempt to force things into a single database
Technology	Infrastructure	Have a shared network drive
Technology	Infrastructure	Develop the ability to design, deploy and reconfigure the enterprise data infrastructure to maximize data value
Technology	Infrastructure	Develop the ability to manage human, technological and process impacts across the organization arising from learning analytics initiatives. This involves managing changes to the systems environment
Technology	Infrastructure	Consider providing a safe environment (e.g., a sandbox) for testing or research purposes.
Technology	Infrastructure	Evaluate technological infrastructure
Technology	Infrastructure	Have the right IT infrastructure
Technology	Infrastructure	Ensure that analytics personnel can create very capable decision support systems driven by analytics.
Technology	Infrastructure	Review and plan technology infrastructure to support data generation, extraction, warehousing and integration
Technology	Infrastructure	Build a sound technical infrastructure
Technology	Infrastructure	Use Git for version control
Technology	Infrastructure	Utilize Object-oriented technologies to minimize the development time for new analytics applications.
Technology	Infrastructure	Use reusable software modules in new analytics model development
Technology	Infrastructure	Have the right tools and applications (IT intensity and ease of data capture, plus data availability)
Technology	Infrastructure	Explore and/or adopt open-source software for learning analytics
Technology	Infrastructure	Ensure to have the right tools and software for analytics
Technology	Infrastructure	Use project management software like Jira, Confluence, and Slack
Technology	Infrastructure	Provide a structure that enables users to access data to improve decision making
Technology	Infrastructure	Create the ability to develop and utilize self-service analysis applications e.g. reports, dashboards, scorecards, online analytical processing (OLAP) and data visualization technologies, which display output in a user-friendly format that is readily understood by non-technical users. These applications are particularly useful for addressing structured problems and facilitate the visual manipulat…
Technology	Infrastructure	Let end-users utilize object-oriented tools to create their own analytics applications.
Technology	Infrastructure	Evaluate resources available for primary users to uptake learning analytics (e.g., access to digital devices)
Technology	Infrastructure	Provide multiple analytics interfaces or entry points for external end-users.
Technology	Infrastructure	Provide transparent access to all platforms and applications within user interfaces.
Technology	System characteristics	Ensure that the system allows information to be readily accessible
Technology	System characteristics	Ensure that the system makes information easy to access.
Technology	System characteristics	Ensure that the system makes information very accessible.
Technology	System characteristics	Document what happens in the data warehouse
Technology	System characteristics	Ensure that learning analyics systems are simple to understand
Technology	System characteristics	Provide packages that offer a complete solution for people who have insufficient programming skills
Technology	System characteristics	Avoid complexity of the system as this could be detrimental to its usability
Technology	System characteristics	Use visualization software packages like Tableau
Technology	System characteristics	Be able to respond to changes in learning and teaching practices
Technology	System characteristics	Be flexible enough to encompass diverse teaching practices
Technology	System characteristics	Applications can be adapted to meet a variety of needs during analytics tasks.
Technology	System characteristics	Use flexible programming languages like R
Technology	System characteristics	Have systems that allow for analytical activities.
Technology	System characteristics	Have systems that can be adapted to meet a variety of analytics needs.
Technology	System characteristics	Ensure that the system can be flexibly adjusted to new demands or conditions during the analytics process.
Technology	System characteristics	Ensure flexibility so that the system can address needs as they arise during the analytics process.
Technology	System characteristics	Use authorization for accessing network drives
Technology	System characteristics	Offer a meaningful guarantee that it will not share private information.
Technology	System characteristics	Protect information about personal issues.
Technology	System characteristics	Protect information about personal identity.
Technology	System characteristics	Have systems that operates reliable for the analytics.
Technology	System characteristics	Have systems that performs reliable for the analytics.
Technology	System characteristics	Be available on mobile platforms
Technology	System characteristics	Be cloud-based
Technology	System characteristics	Be standards‐based and technology platform agnostic
Technology	System characteristics	Avoid dependency on technologies that are likely to be replaced or quickly become obsolete
Technology	System characteristics	Have workstations with fast processors and enough memory
Technology	System characteristics	Ensure that software applications can be easily transported and used across multiple analytics platforms.
Technology	System characteristics	Realize that system integration is important for leveraging value from learning analytics and is facilitated by the flexible design of technology infrastructure and systems architecture. It also introduces a degree of complexity and therefore should be done with care and careful consideration of the need
Technology	System characteristics	Ensure enough memory can be used to manipulate a dataset of a couple of GB's
Technology	System characteristics	You always need to be connected with the network drive
Technology	System characteristics	Develop tools and algorithms that provide real time comprehensive feedback to students
Technology	System characteristics	Reduce runtime of scripts
Technology	System characteristics	Use learning analytics systems in such way they save a lot of time
Technology	System characteristics	Support real-time processing of multiple learning data streams
Technology	System characteristics	Reduce runtime of processing of requests
Technology	System characteristics	Have system that provide information in a timely fashion.
Technology	System characteristics	Eliminate delay in scoring course credits and processing them
Technology	System characteristics	Enable multiple levels of accommodation of sophistication of students and teachers as 'users'
Technology	System characteristics	Make sure users can trust the system's output
Technology	System characteristics	Let have members of the learning analytics team have total control over what they do.
Technology	System characteristics	Have modern, visual interfaces.
Technology	System characteristics	Have visual interfaces.
Technology	System characteristics	Support data visualization that enables users to easily interpret results
Technology	System characteristics	Ensure that the collaboration portal enables work to be able to be shared shared and intellectual property to be spread throughout the organization.

## Sheet: Lijst
	Ja, is in roadmap beschreven.
	Ja, is reeds in organisatie aanwezig.
	Nee, is bewust niet in roadmap beschreven
	Nee, is niet in roadmap beschreven.
	Deels beschreven.
